# Supplementary material
Source: PubMed Central journal article supplement (PMC4535223)
Supplement: Yarris_Suppl.Survey.pdf [file Yarris_Suppl.Survey.pdf]

# 1.

We are interested in your opinions about clinical teaching in the ED, feedback in the ED, and real-time use of milestones in the ED. Thank you very much for filling out this short survey.

**\*1. Please select your role, the questions that will follow are specific to either residents or faculty.**

- Resident
- Faculty

## 2. Resident specific questions

**1. What level of learner are you? (Based on ACGME classification)**

- Beginner (PGY 1)
- Intermediate (PGY 2)
- Final Year/Advanced (PGY 3)

**2. How satisfied are you with the CLINICAL teaching you receive in the Emergency Department during your shifts?**

- Very satisfied
- Somewhat satisfied
- Neither satisfied nor dissatisfied
- Somewhat dissatisfied
- Very dissatisfied

Comments regarding clinical teaching

Yarris LM, Jones D, Kornegay KG, Hasen KJ. The Milestones Passport: A Learner-Centered Application of the Milestone Framework to Prompt Real-Time Feedback in the Emergency Department. *J Grad Med Educ.* 2014;6(3):555-560.

**3. How satisfied are you with the real-time feedback you receive from attendings during or immediately after your shifts in the ED? (This is referring to direct communication between you and the attending)**

- Very satisfied
- Somewhat satisfied
- Neither satisfied nor dissatisfied
- Somewhat dissatisfied
- Very dissatisfied

Comments regarding feedback in the ED

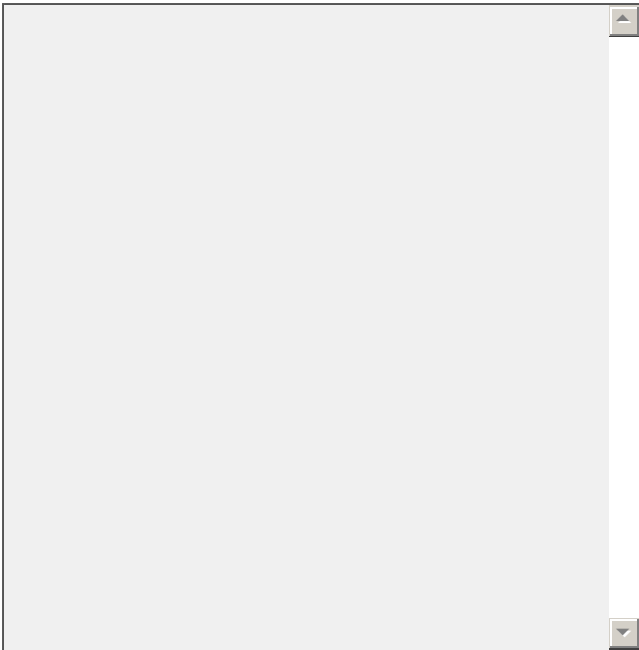

Yarris LM, Jones D, Kornegay KG, Hasen KJ. The Milestones Passport: A Learner-Centered Application of the Milestone Framework to Prompt Real-Time Feedback in the Emergency Department. *J Grad Med Educ.* 2014;6(3):555-560.

#### 4. How satisfied are you with the process of real-time Milestones assessment in the ED?

- Very satisfied
- Somewhat satisfied
- Neither satisfied nor dissatisfied
- Somewhat dissatisfied
- Very dissatisfied

Comments regarding the evaluate evaluations

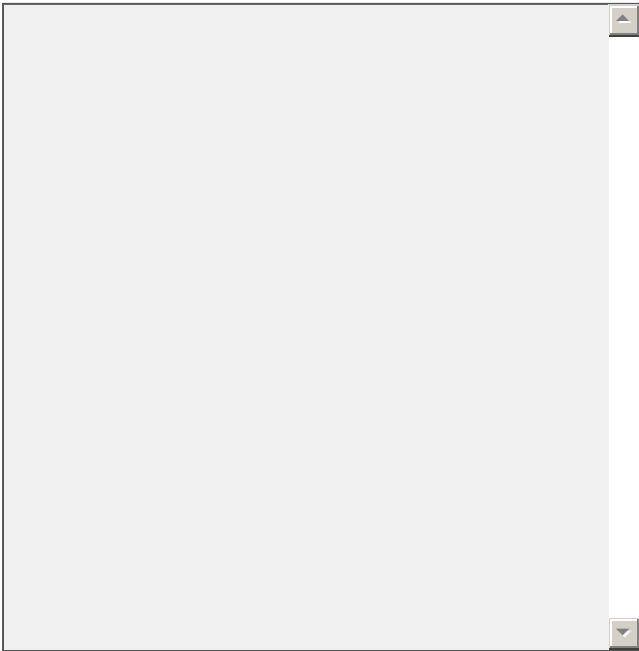

Yarris LM, Jones D, Kornegay KG, Hasen KJ. The Milestones Passport: A Learner-Centered Application of the Milestone Framework to Prompt Real-Time Feedback in the Emergency Department. *J Grad Med Educ.* 2014;6(3):555-560.

#### 5. How often do you complete a milestone assessment and feedback encounter during your ED shifts?

- Every shift
- Not every shift, but every 2-3 shifts
- Every 4-5 shifts
- Every 6 shifts or less frequently

#### 6. When you do complete a milestone during your ED shifts, who usually initiates the process?

- I usually initiate it
- The attending usually initiates it
- I initiate it with the same frequency as the attendings do

**7. How much time, on average, does it take to complete a milestone (assess and feedback components) in the ED?**

- 0-2 minutes
- 3-5 minutes
- 6-10 minutes
- >10 minutes

**8. Do you have any other comments about the process of completing milestones and milestone-triggered feedback in the ED?**

**3. Faculty specific questions**

**1. How satisfied are you with the CLINICAL teaching you are currently engaging in with ED residents during your shifts?**

- Very satisfied
- Somewhat satisfied
- Neither satisfied nor dissatisfied
- Somewhat dissatisfied
- Very dissatisfied

Comments regarding clinical teaching

Yarris LM, Jones D, Kornegay KG, Hasen KJ. The Milestones Passport: A Learner-Centered Application of the Milestone Framework to Prompt Real-Time Feedback in the Emergency Department. *J Grad Med Educ.* 2014;6(3):555-560.

**2. How satisfied are you with the real-time feedback you deliver to residents during or immediately after your shifts in the ED? (This is referring to direct communication between you and the resident, NOT the evaluate rotation evaluations)**

- Very satisfied
- Somewhat satisfied
- Neither satisfied nor dissatisfied
- Somewhat dissatisfied
- Very dissatisfied

Comments regarding feedback in the ED

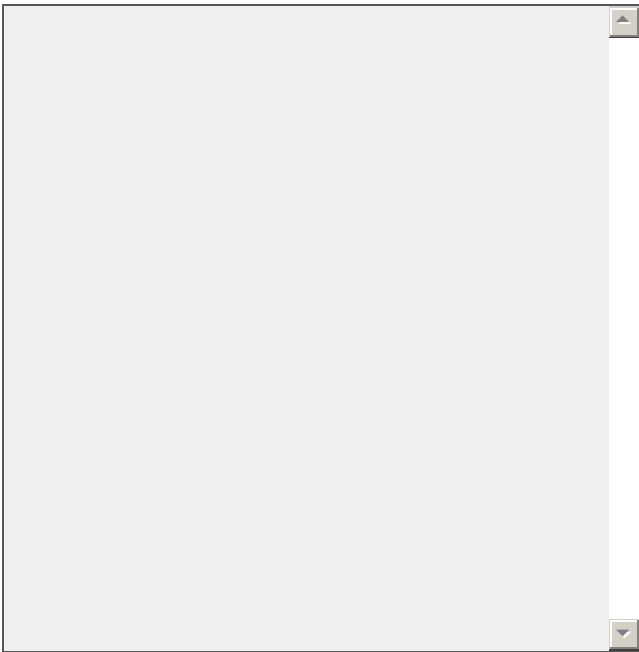

Yarris LM, Jones D, Kornegay KG, Hasen KJ. The Milestones Passport: A Learner-Centered Application of the Milestone Framework to Prompt Real-Time Feedback in the Emergency Department. *J Grad Med Educ.* 2014;6(3):555-560.

### 3. How satisfied are you with the process of real-time Milestones assessment in the ED?

- Very satisfied
- Somewhat satisfied
- Neither satisfied nor dissatisfied
- Somewhat dissatisfied
- Very dissatisfied

Comments regarding the evaluate evaluations

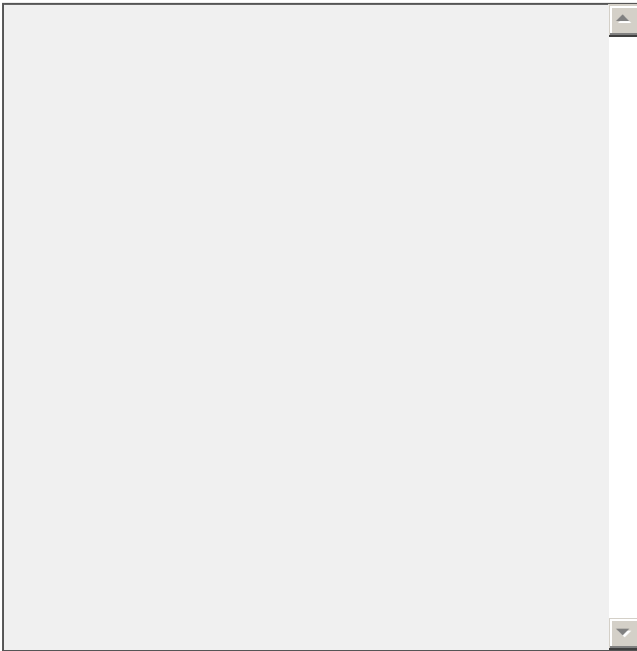

Yarris LM, Jones D, Kornegay KG, Hasen KJ. The Milestones Passport: A Learner-Centered Application of the Milestone Framework to Prompt Real-Time Feedback in the Emergency Department. *J Grad Med Educ.* 2014;6(3):555-560.

### 4. How often do you complete a milestone assessment and feedback encounter during your ED shifts?

- Every shift
- Not every shift, but every 2-3 shifts
- Every 4-5 shifts
- Every 6 shifts or less frequently

### 5. When you do complete a milestone during your ED shifts, who usually initiates the process?

- I usually initiate it
- The residents usually initiates it
- I initiate it with the same frequency as the residents do

**6. How much time, on average, does it take to complete a milestone (assess and feedback components) in the ED?**

- 0-2 minutes
- 3-5 minutes
- 6-10 minutes
- >10 minutes

**7. Do you have any other comments about the process of completing milestones and milestone-triggered feedback in the ED?**

## 4. Last Page

Thank you very much for your feedback!

Yarris LM, Jones D, Kornegay KG, Hasen KJ. The Milestones Passport: A Learner-Centered Application of the Milestone Framework to Prompt Real-Time Feedback in the Emergency Department. *J Grad Med Educ.* 2014;6(3):555-560.
